# Supplementary material
Source: PubMed Central journal article supplement (PMC8718128)
Supplement: hvab132_supplementary_data.pdf [file hvab132_supplementary_data.pdf]

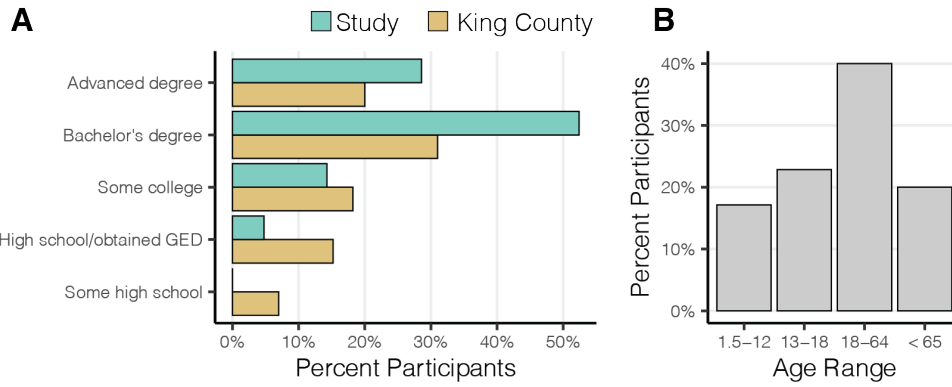

**Supplementary Figure 1. Educational attainment and age range of 35 swab usability study participants. (A)** The highest level of education attained by recruited participants (teal) versus King County, Washington (golden). **(B)** Percentage of recruited study participants in the displayed age ranges.

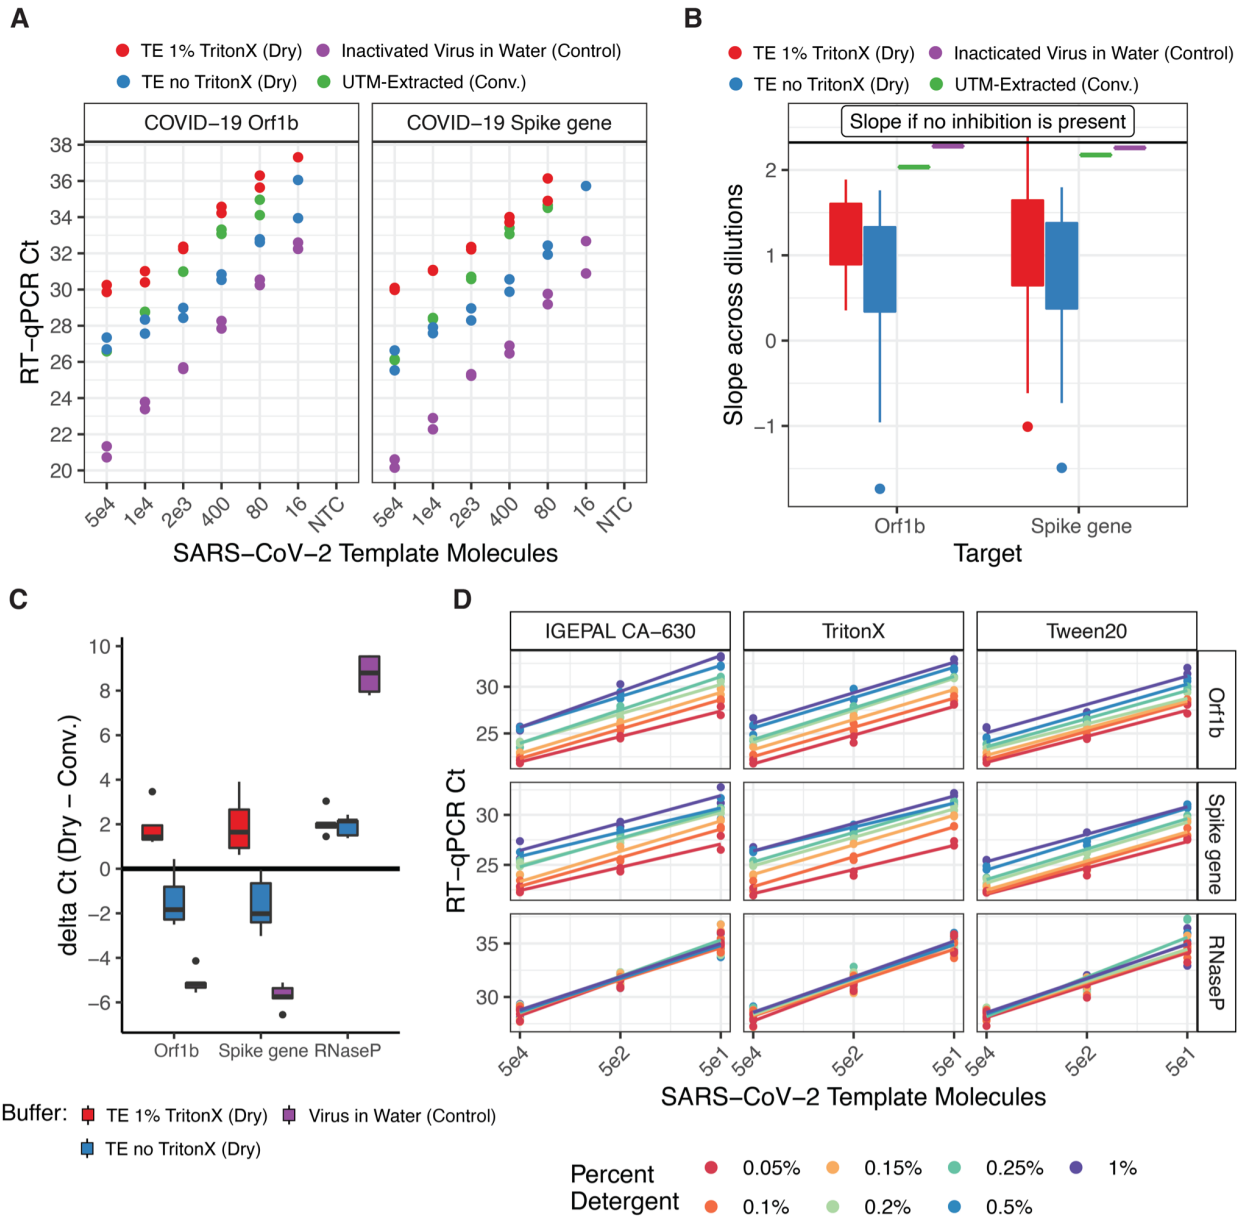

**Supplementary Figure 2. Comparison of RT-qPCR detection of inactivated virus from conventional and dry swabs.** (A) Crossing threshold (Ct) values shown for specimens comprising a self swab and inactivated SARS-CoV-2 virus for both the ORF1b primer-probe set (left) and the Spike gene primer-probe set (right). Colors correspond to unique combinations of extraction protocol or controls. All specimens were measured twice in independent RT-qPCR reactions. No template control (-) wells contained either low-TE buffer or water. Extracted and extraction-free reactions were normalized so that each reaction received the same number of inactivated viral template molecules. (B) Slope of dilution series for a set of contrived swabs. Black line indicates the expected slope under ideal conditions. The observed slopes for extraction-free RT-qPCR samples indicate the presence of inhibitors originating from the swab or nasal secretions. (C) Delta Ct values between conventionally processed swabs and dry processed swabs at matched dilutions for this contrived experiment. (D) Ct values for three probes (rows: Orf1b, Spike, RNase P) assayed in buffers containing one of three detergents

(columns: IGEPAL CA-360, TritonX, Tween20) across ten-fold dilutions. Linear model (colored line) was fit for observations (colored points) at each detergent percent.

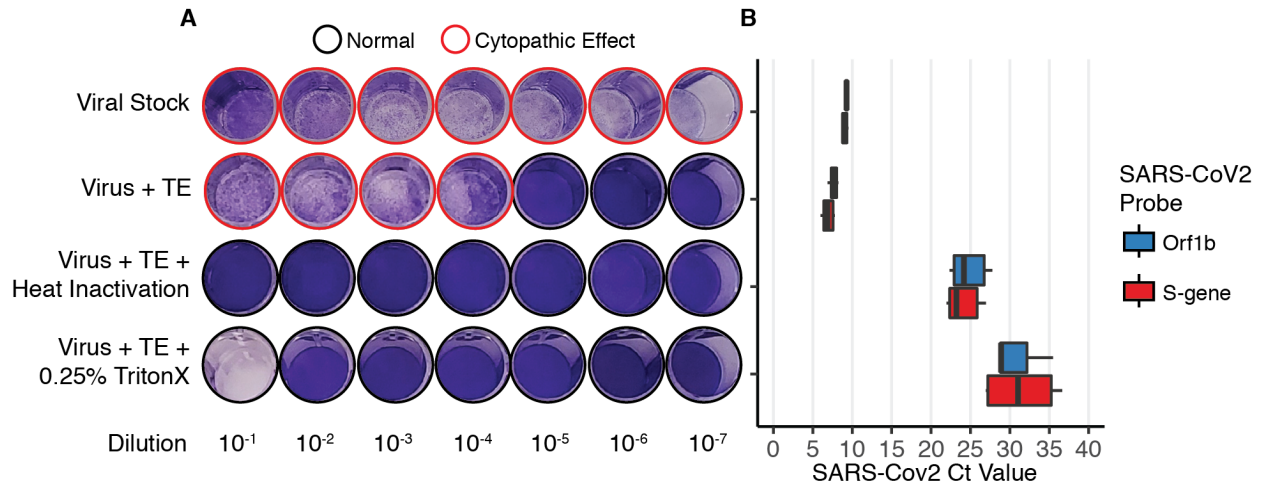

**Supplementary Figure 3. Comparison of heat treatment or detergent to inactivate SARS-CoV-2.** (A) Crystal violet staining shows the cytopathic effects of SARS-CoV-2 dilutions on Vero cells after incubation with TE, TE + heat inactivation at 65°C for 10 minutes or TE + 0.25% Triton. (B) RT-qPCR Ct values of SARS-CoV-2 RNA isolated from Vero E6 cells. Purified viral particles were first incubated with TE, TE + heat inactivation at 65°C for 10 minutes or TE + 0.25% TritonX.

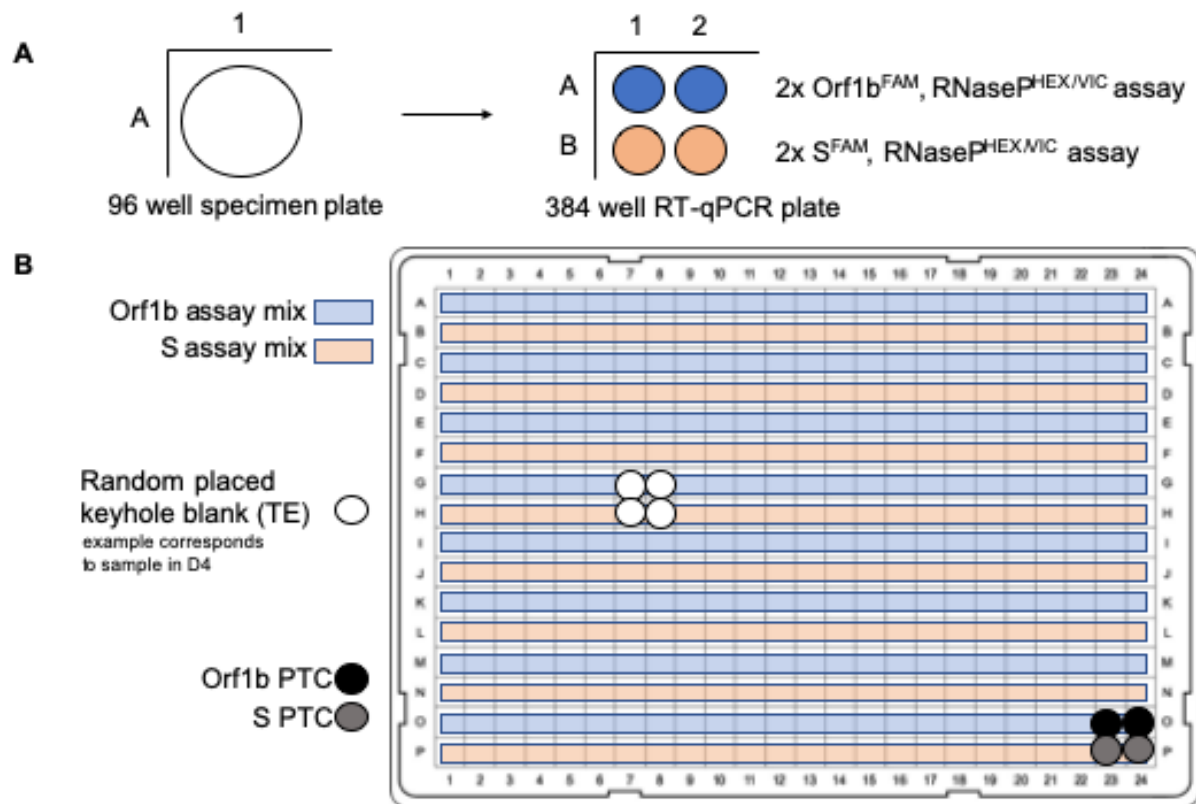

**Supplementary Figure S4. Plate layout of the Northwest Genomics Center SwabExpress RT-qPCR test.** (A) Each sample is loaded into 4 independent wells on a 96 well plate and tested in duplicate for the Orf1b and S-gene (Spike gene) primer/probes. (B) Included on every sample plate is a randomly positioned low-TE keyhole blank (white) and a positive template control (PTC) well containing synthetic SARS-CoV-2 template and human Hap1-RNA (black and grey).

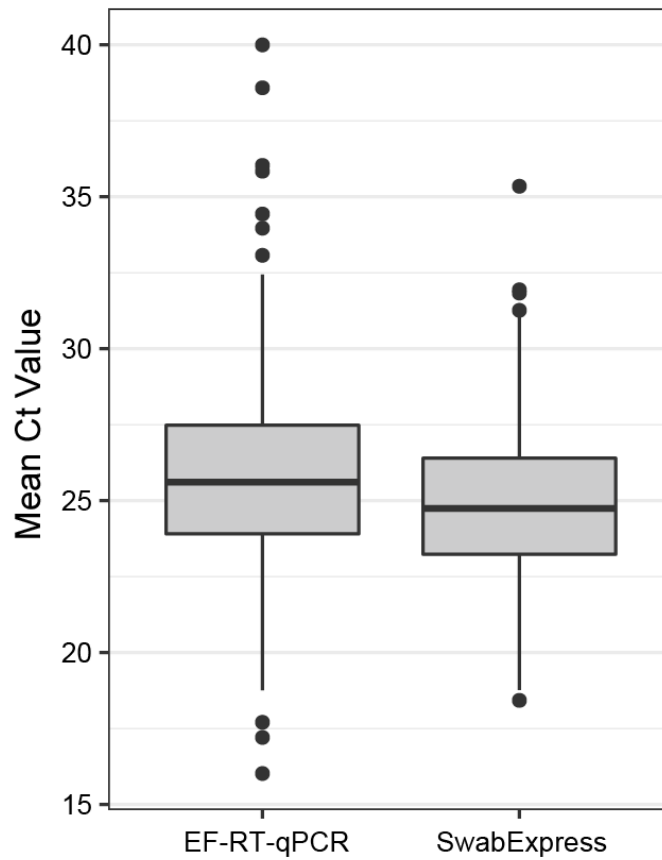

**Supplementary Figure S5. SwabExpress is more sensitive for RNase P than extraction-free RT-qPCR.** 1222 samples were tested in parallel by extraction-free RT-qPCR (EF-RT-qPCR) and SwabExpress. Samples run through the SwabExpress protocol, which includes a Proteinase K digestion, had lower mean RNase P Cts than the same samples run on EF-RT-qPCR.

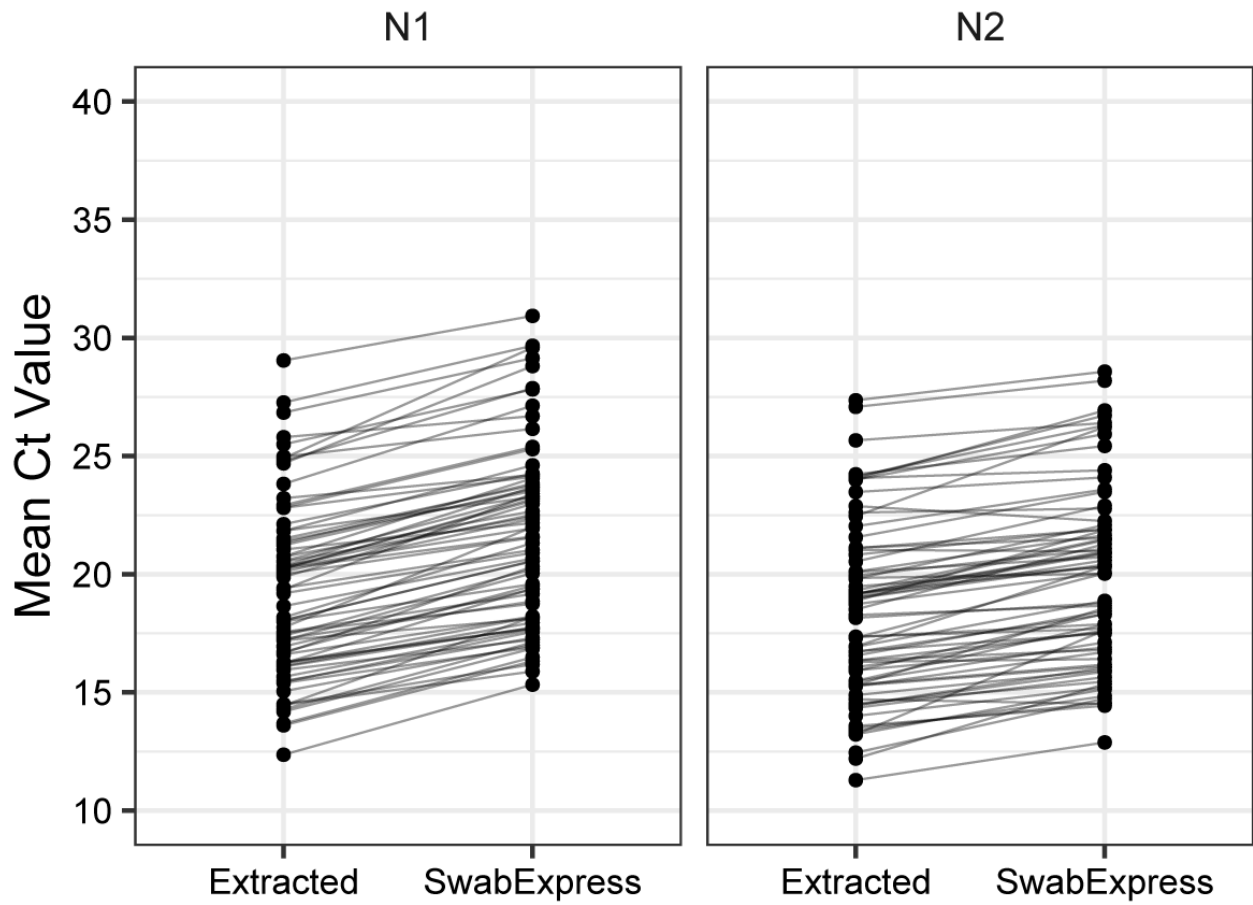

**Supplementary Figure 6. SwabExpress also works with the widely used CDC-N1 and CDC-N2 probesets.** Mean crossing threshold for 75 parallel specimens that were extracted or run through SwabExpress for the commonly used SARS-CoV-2 CDC N1 and N2 probe set.

**Table S1A. Age of study participants**

| Age Groups                          | Number | %    | Average Age<br>(within group) |
|-------------------------------------|--------|------|-------------------------------|
| Between 18 months - 12 years<br>old | 6      | 17%  | 8.7                           |
| Between 13 and 18 years old         | 8      | 23%  | 15.1                          |
| Between 18 and 64 years old         | 14     | 40%  | 40.7                          |
| Over 65 years old                   | 7      | 20%  | 68.3                          |
| TOTAL                               | 35     | 100% | 34.9                          |
| TOTAL                               | 35     | 100% | 34.9                          |



**Table S1B. Educational attainment of study participants**

| <b>Education Levels (of participants 18 &amp; over)</b>          |           |                         |                        |
|------------------------------------------------------------------|-----------|-------------------------|------------------------|
| <b>"What is your highest level of education obtained?"</b>       |           |                         |                        |
| <b>Response</b>                                                  | <b>N</b>  | <b>Participants (%)</b> | <b>King County (%)</b> |
| Less than high school graduate                                   | 0         | 0%                      | 7%                     |
| Graduated high school/obtained GED                               | 1         | 5%                      | 15%                    |
| Some college (including vocational training, associate's degree) | 3         | 14%                     | 18%                    |
| Bachelor's degree                                                | 11        | 52%                     | 31%                    |
| Advanced degree                                                  | 6         | 29%                     | 20%                    |
| <b>TOTAL</b>                                                     | <b>21</b> | <b>100%</b>             |                        |

**Table S1C. Household income of study participants**

| <b>Household Income</b>                                                                                                                                                                                                                        |    |                        |                 |
|------------------------------------------------------------------------------------------------------------------------------------------------------------------------------------------------------------------------------------------------|----|------------------------|-----------------|
| <i>"Please choose the range that best represents your household income last year (before taxes). If you are still considered a dependent for tax purposes, choose the range that describes your parent/legal guardian's household income."</i> |    |                        |                 |
| Response                                                                                                                                                                                                                                       | N  | Study participants (%) | King County (%) |
| Less than or equal to \$25,000                                                                                                                                                                                                                 | 0  | 0%                     | 12%             |
| Between \$25,001 to \$50,000                                                                                                                                                                                                                   | 0  | 0%                     | 14%             |
| Between \$50,001 to \$75,000                                                                                                                                                                                                                   | 1  | 2.9%                   | 14%             |
| Between \$75,001 to \$100,000                                                                                                                                                                                                                  | 7  | 20%                    | 12%             |
| Between \$100,001 to \$125,000                                                                                                                                                                                                                 | 4  | 11.4%                  | 19%             |
| Between \$125,001 to \$150,000                                                                                                                                                                                                                 | 3  | 8.6%                   |                 |
| Over \$150,000                                                                                                                                                                                                                                 | 16 | 45.7%                  | 29%             |
| Don't know                                                                                                                                                                                                                                     | 1  | 2.9%                   |                 |
| Prefer not to say                                                                                                                                                                                                                              | 3  | 8.6%                   |                 |
| TOTAL                                                                                                                                                                                                                                          | 35 | 100%                   |                 |

**Table S1D. Race of study participants**

| <i><b>“How would you describe your race? Check all that apply”</b></i> |    |                        |                 |
|------------------------------------------------------------------------|----|------------------------|-----------------|
| Response                                                               | N  | Study Participants (%) | King County (%) |
| American Indian or Alaska Native                                       | 0  | 0%                     | <1%             |
| Asian                                                                  | 10 | 24%                    | 17%             |
| Native Hawaiian or Pacific Islander                                    | 0  | 0%                     | 1%              |
| Black or African American                                              | 0  | 0%                     | 6%              |
| White                                                                  | 30 | 73%                    | 65%             |
| Other                                                                  | 1  | 3%                     | 10%             |
| Prefer Not to Say                                                      | 0  | 0%                     |                 |

**Table S2A. Sample collection and packaging checklist**

| <b>Sample Collection and Packaging Checklist and results</b> |     |      |
|--------------------------------------------------------------|-----|------|
|                                                              | Yes | %    |
| Able to locate and identify swab and tube                    | 35  | 100% |
| Used correct end of swab                                     | 35  | 100% |
| Sample both nostrils with same swab                          | 34  | 97%  |
| Swabbed 'fresh' nostril first                                | 35  | 100% |
| Swabbed nostrils in correct order                            | 33  | 94%  |
| Swabbed at least 5 circles in each nostril                   | 33  | 94%  |
| Swabbed for at least 10 seconds in each nostril              | 29  | 83%  |
| Wrote name & date on tube                                    | 34  | 97%  |
| Put tube into biohazard bag                                  | 35  | 100% |
| Able to locate and identify swab and tube                    | 35  | 100% |
| Used correct end of swab                                     | 35  | 100% |
| Swabbed 'fresh' nostril first                                | 35  | 100% |
| Sample both nostrils with same swab                          | 34  | 97%  |
| Inserted entire tip of the swab into the nostrils            | 35  | 100% |
| Swabbed at least 5 circles in each nostril                   | 33  | 94%  |
| Swabbed for at least 10 seconds in each nostril              | 32  | 91%  |
| Wrote name & date on tube                                    | 34  | 97%  |
| Put tube into biohazard bag                                  | 35  | 100% |
| Put biohazard bag into box                                   | 34  | 97%  |
| Put box into polymailer shipping bag                         | 34  | 97%  |

**Table S2B. Observed errors or unwanted outcomes during sample collection or packaging**

| <b>Did any of the following errors or reactions occur during observation?</b>   |          |          |
|---------------------------------------------------------------------------------|----------|----------|
|                                                                                 | <b>N</b> | <b>%</b> |
| Contaminated end of swabs with hand/fingers                                     | 0        | 0%       |
| Contaminated end of swabs by setting it down on a table or non-sanitary surface | 0        | 0%       |
| Did not put both tubes in biohazard bag                                         | 0        | 0%       |
| Did not put biohazard bag in box                                                | 1        | 3%       |
| Did not put box in polymailer shipping bag                                      | 1        | 3%       |
| Did not write name on tube                                                      | 0        | 0%       |
| Did not write date on tube                                                      | 0        | 0%       |
| Nose bleed                                                                      | 0        | 0%       |
| Sneezed during or after swabbing                                                | 4        | 11%      |
| Expressed frustration or confusion about one or more of the steps               | 3        | 9%       |
| Other*                                                                          | 2        | 6%       |

**Table S3. Summary of SwabExpress limit of detection (LoD) assay results.** Lowest concentration with 95% of the replicates detected for each probe is highlighted (in light grey) and bolded.

| Molecules / 5uL Reaction | Assay        | Percent Detected | Number of replicates | Number of replicates detected | Average Ct   | Standard deviation | %Coefficient of variation |
|--------------------------|--------------|------------------|----------------------|-------------------------------|--------------|--------------------|---------------------------|
| 5                        | Spike        | 50.0%            | 20                   | 10                            | 36.03        | 0.51               | 1.40%                     |
| 10                       | Spike        | 90.0%            | 20                   | 18                            | 34.22        | 0.65               | 1.90%                     |
| <b>20</b>                | <b>Spike</b> | <b>95.4%</b>     | <b>22</b>            | <b>21</b>                     | <b>34.49</b> | <b>0.47</b>        | <b>1.35%</b>              |
| 40                       | Spike        | 100%             | 24                   | 24                            | 33.76        | 0.94               | 2.78%                     |
| 80                       | Spike        | 100%             | 24                   | 24                            | 31.83        | 0.31               | 0.97%                     |
| 160                      | Spike        | 100%             | 24                   | 24                            | 30.36        | 0.23               | 0.76%                     |
| 320                      | Spike        | 100%             | 24                   | 24                            | 30.08        | 0.15               | 0.51%                     |
| 640                      | Spike        | 100%             | 24                   | 24                            | 28.86        | 0.27               | 0.92%                     |
| 5                        | Orf1b        | 85.0%            | 20                   | 17                            | 36.87        | 0.76               | 2.06%                     |
| <b>10</b>                | <b>Orf1b</b> | <b>100%</b>      | <b>20</b>            | <b>20</b>                     | <b>34.80</b> | <b>0.53</b>        | <b>1.52%</b>              |
| 20                       | Orf1b        | 100%             | 22                   | 22                            | 34.56        | 0.48               | 1.38%                     |
| 40                       | Orf1b        | 100%             | 24                   | 24                            | 33.94        | 0.50               | 1.48%                     |
| 80                       | Orf1b        | 100%             | 24                   | 24                            | 32.15        | 0.26               | 0.79%                     |
| 160                      | Orf1b        | 100%             | 24                   | 24                            | 31.01        | 0.24               | 0.77%                     |
| 320                      | Orf1b        | 100%             | 24                   | 24                            | 30.74        | 0.31               | 1.01%                     |
| 640                      | Orf1b        | 100%             | 24                   | 24                            | 29.56        | 0.28               | 0.94%                     |

**Table S4. Concordance of 619 AN specimens between KingFisher nucleic acids extraction (KF) and EF-RT-qPCR (EF).**

|                                      | Plate 1<br>COV119 |    | Plate 2<br>RIP107 |    | Plate 3<br>COV120 |    | Plate 4<br>RIP108 |    | Plate 5<br>RIP109 |    | Plate 6<br>RIP112 |    | Plate 7<br>COV179  |    |
|--------------------------------------|-------------------|----|-------------------|----|-------------------|----|-------------------|----|-------------------|----|-------------------|----|--------------------|----|
| <b>Swab collection type</b>          | Observed          |    | At-home           |    | Observed          |    | At-home           |    | At-home           |    | At-home           |    | Observed , at-home |    |
| <b>Date</b>                          | Oct 26            |    | Oct 26            |    | Oct 26            |    | Oct 27            |    | Oct 27            |    | Oct 28            |    | Nov 8              |    |
| <b>Operator</b>                      | SC                | SC | EM                | EM | EM                | EM | WZ                | WZ | WZ                | WZ | BB                | BB | BB                 | BB |
| <b>QuantStudio</b>                   | 1                 | 2  | 1                 | 2  | 1                 | 2  | 1                 | 2  | 1                 | 2  | 2                 | 1  | 1                  | 2  |
| <b>Clinical result</b>               | KF                | EF | KF                 | EF |
| <b>Positive</b>                      | 0                 | 0  | 4                 | 4  | 0                 | 0  | 3                 | 2  | 0                 | 0  | 1                 | 1  | 1                  | 1  |
| <b>Low- positive (inconclusive )</b> | 1                 | 0  | 0                 | 0  | 0                 | 0  | 0                 | 2  | 1                 | 0  | 0                 | 0  | 0                  | 0  |
| <b>Negative</b>                      | 87                | 88 | 83                | 83 | 87                | 88 | 87                | 86 | 89                | 90 | 85                | 84 | 89                 | 89 |
| <b>RNase P failures</b>              | 0                 | 0  | 0                 | 0  | 1                 | 0  | 0                 | 0  | 0                 | 0  | 0                 | 1  | 0                  | 0  |
| <b>Total</b>                         | 88                | 88 | 87                | 87 | 88                | 88 | 90                | 90 | 90                | 90 | 86                | 86 | 90                 | 90 |

**Table S5. Concordance of prospectively collected swab specimens with or without extraction**

|                                    |              | <b>SARS-CoV-2 test with<br/>KingFisher nucleic acids extraction</b> |              |          |           |
|------------------------------------|--------------|---------------------------------------------------------------------|--------------|----------|-----------|
|                                    |              | positive                                                            | inconclusive | negative | test fail |
| <b>SwabExpress</b>                 | positive     | 8                                                                   | 0            | 0        | 0         |
|                                    | inconclusive | 1                                                                   | 0            | 1        | 0         |
|                                    | negative     | 0                                                                   | 2            | 605      | 1         |
|                                    | test fail    | 0                                                                   | 0            | 1        | 0         |
| Total                              |              | 9                                                                   | 2            | 607      | 1         |
| positive agreement (9/9)           |              | 100%                                                                |              |          |           |
| inconclusive agreement (0/2)       |              | 0%                                                                  |              |          |           |
| negative agreement (605/606)       |              | 99.8%                                                               |              |          |           |
| failed due to poor quality (1/619) |              | 0.16%                                                               |              |          |           |



**Table S6. Comparison of Ct values for SARS-CoV-2 targets from specimens by the SARS-CoV-2 test with KingFisher extraction (KF) and SwabExpress (EF)**

|                 | KF - Orf1b   | KF Spike     | EF - Orf1b   | EF - S gene  | KF              | EF              | ΔCt   | ΔCt   |
|-----------------|--------------|--------------|--------------|--------------|-----------------|-----------------|-------|-------|
| Clinical Sample | Mean ± SD    | Mean ± SD    | Mean ± SD    | Mean ± SD    | Clinical Result | Clinical Result | Orf1b | Spike |
| 87359aac        | 36.85 *      | 38.32 *      | undet        | undet        | incon           | neg             | N/A   | N/A   |
| 7bd7b5e1        | 27.41 ± 0.11 | 25.42 ± 0.08 | 29.92 ± 0.00 | 29.05 ± 0.03 | pos             | pos             | 2.51  | 3.63  |
| d0023767        | 26.07 ± 0.01 | 25.48 ± 0.18 | 27.92 ± 0.11 | 27.15 ± 0.13 | pos             | pos             | 1.85  | 1.67  |
| 4757675b        | 29.62 ± 0.11 | 27.95 ± 0.10 | 30.25 ± 0.02 | 28.61 ± 0.42 | pos             | pos             | 0.63  | 0.66  |
| 7a22a1f3        | 27.88 ± 0.13 | 27.1 ± 0.21  | 28.67 ± 0.14 | 27.51 ± 0.06 | pos             | pos             | 0.79  | 0.41  |
| 57f5bb53        | 13.50 ± 0.11 | 12.55 ± 0.45 | 15.66 ± 0.05 | 15.04 ± 0.35 | pos             | pos             | 2.16  | 2.49  |
| 19344233        | 20.18 ± 0.04 | 19.31 ± 0.23 | 21.66 ± 0.03 | 21.25 ± 0.11 | pos             | pos             | 1.48  | 1.94  |
| f343051c        | 35.22 ± 0.92 | 34.82 ± 0.03 | 36.03 ± 0.36 | undet        | pos             | incon           | 0.81  | NA    |
| cc80131a        | undet        | undet        | undet        | 39.28 ± 0.60 | neg             | incon           | NA    | NA    |
| aef02e4c        | 36.6 *       | 39.05 *      | undet        | undet        | incon           | neg             | NA    | NA    |
| 20e0f036        | 25.44 ± 0.16 | 24.21 ± 0.08 | 29.71 ± 0.29 | 29.50 ± 0.02 | pos             | pos             | 4.27  | 5.29  |
| 6b496def        | 16.92 ± 0.03 | 16.08 ± 0.13 | 20.07 ± 0.00 | 19.61 ± 0.38 | pos             | pos             | 3.15  | 3.53  |

\* only 1 replicate; pos - Positive; neg - Negative; incon - Inconclusive; undet - Undetermined Ct > 40

**Table S7. Summary of RNase P detection failure by sample (SwabExpress)**

| <b>RNase P reactions:</b>  | <b>Number of Specimens in group</b> |
|----------------------------|-------------------------------------|
| Failed 1 RNase P reaction  | 563                                 |
| Failed 2 RNase P reactions | 151                                 |
| Failed 3 RNase P reactions | 38                                  |
| Failed 4 RNase P reactions | 194                                 |

**Table S8. Counts of Spurious (Ct < 30) SARS-CoV-2 amplification from EF-RT-qPCR**

| <b>Target</b> | <b>Number of specimens with one well of spurious amplification</b> |
|---------------|--------------------------------------------------------------------|
| Orf1b         | 35                                                                 |
| S gene        | 194                                                                |

**Table S9. Comparison of RNase P detection failure with and without Proteinase K (PK) digestion**

|              |                            | <b>EF-RT-qPCR (-PK)<br/>RNase P<br/>amplification</b> | <b>SwabExpress (+PK)<br/>RNase P<br/>amplification</b> |
|--------------|----------------------------|-------------------------------------------------------|--------------------------------------------------------|
| <b>Plate</b> | <b>Instance<br/>Number</b> | <b># wells amplified/total<br/># wells</b>            | <b># wells amplified/total<br/># wells</b>             |
| COV320       | 1                          | 3/4                                                   | 4/4                                                    |
| COV326       | 1                          | 3/4                                                   | 4/4                                                    |
| COV331       | 1                          | 1/4                                                   | 4/4                                                    |
|              | 2                          | 0/4                                                   | 4/4                                                    |
|              | 3                          | 4/4                                                   | 3/4                                                    |
|              | 4                          | 3/4                                                   | 4/4                                                    |
| COV351       | 1                          | 3/4                                                   | 4/4                                                    |
|              | 2                          | 3/4                                                   | 4/4                                                    |
|              | 3                          | 3/4                                                   | 4/4                                                    |
|              | 4                          | 3/4                                                   | 4/4                                                    |
|              | 5                          | 3/4                                                   | 4/4                                                    |
| COV352       | 1                          | 2/4                                                   | 4/4                                                    |
|              | 2                          | 1/4                                                   | 4/4                                                    |
|              | 3                          | 2/4                                                   | 4/4                                                    |
|              | 4                          | 3/4                                                   | 4/4                                                    |
|              | 5                          | 3/4                                                   | 4/4                                                    |

|        |   |                 |                |
|--------|---|-----------------|----------------|
|        | 6 | 3/4             | 4/4            |
| COV358 | 1 | 3/4             | 4/4            |
|        | 2 | 1/4             | 4/4            |
| COV360 | 1 | 4/4             | 3/4            |
| total  |   | 27/4888 (0.55%) | 2/4888 (0.04%) |

**Table S10. Concordance of clinical results for specimens with total nucleic acids extraction (Kingfisher Flex), heat treatment (EF-RT-qPCR) or Proteinase K digestion plus heat treatment (SwabExpress)**

|                    | Sample Prep Method |            |             |
|--------------------|--------------------|------------|-------------|
| Qualitative Result | KingFisher Flex    | EF-RT-qPCR | SwabExpress |
| # Positive         | 23                 | 24         | 28          |
| # Inconclusive     | 3                  | 3          | 0           |
| # Negative         | 4                  | 3          | 2           |

**Table S11. Concordance of prospectively collected swab specimens from participants with or without extraction**

|                                     |              | SARS-CoV-2 test with<br>KingFisher nucleic acids extraction |              |          |           |
|-------------------------------------|--------------|-------------------------------------------------------------|--------------|----------|-----------|
|                                     |              | positive                                                    | inconclusive | negative | test fail |
| <b>SwabExpress</b>                  | positive     | 9                                                           | 1            | 0        | 0         |
|                                     | inconclusive | 0                                                           | 0            | 1        | 0         |
|                                     | negative     | 0                                                           | 0            | 1157     | 1         |
|                                     | test fail    | 0                                                           | 0            | 0        | 0         |
| Total                               |              | 9                                                           | 1            | 1158     | 1         |
| positive agreement (9/9)            |              | 100%                                                        |              |          |           |
| inconclusive agreement (0/1)        |              | 0%                                                          |              |          |           |
| negative agreement (1157/1158)      |              | 99.91%                                                      |              |          |           |
| failed due to poor quality (1/1169) |              | 0.08%                                                       |              |          |           |

**Table S12. Mean  $\pm$  SD of 75 positive specimens extracted on the Roche Magna Pure 96 (MP96) or processed SwabExpress (SE) protocol and amplified using the N1 and N2 CDC probe sets.**

| Probe | MP96<br>Mean $\pm$ SD | SwabExpress<br>Mean $\pm$ SD | $\Delta$ Ct<br>[SE-MP96] |
|-------|-----------------------|------------------------------|--------------------------|
| N1    | 19.22 $\pm$ 3.67      | 21.79 $\pm$ 4.33             | 2.57                     |
| N2    | 18.31 $\pm$ 3.73      | 19.80 $\pm$ 3.72             | 1.49                     |



**Table S13. SwabExpress per sample cost breakdown.** Values displayed in US dollars.

| <b>Item</b>       | <b>SwabExpress</b> |
|-------------------|--------------------|
| US Cotton #3 Swab | \$0.29             |
| Transport Tube    | \$0.61             |
| Barcode Stickers  | \$0.50             |
| Low TE            | \$0.05             |
| Proteinase K      | \$0.14             |
| RT-qPCR Reagents  | \$2.67             |
| Lab Consumables   | \$1.72             |
